# Supplementary material
Source: publisher figshare collection journal article supplement (https://acs.figshare.com/ndownloader/files/25442300)
Supplement: Supplementary file 1 [file 25442300]

## Supporting Information for

# Regioselective Functionalization of the Mesoporous Metal-Organic Framework, NU-1000, with Photo-active *tris*-(2,2'-Bipyridine)ruthenium(II)

Hisanori Nagatomi,<sup>a,b</sup> Leighanne C. Gallington,<sup>c</sup> Subhadip Goswami,<sup>a</sup> Jiaxin Duan,<sup>a</sup> Karena W. Chapman,<sup>d</sup> Nobuhiro Yanai,<sup>b,e</sup> Nobuo Kimizuka,<sup>b</sup> Omar K. Farha<sup>a</sup> and Joseph T. Hupp,<sup>a\*</sup>

<sup>a</sup>*Department of Chemistry, Northwestern University 2145 Sheridan Road, Evanston, IL 60208-3113 (USA).*

<sup>b</sup>*Department of Chemistry and Biochemistry, Graduate School of Engineering, Center for Molecular Systems (CMS), Kyushu University, 744 Moto-oka, Nishi-ku, Fukuoka 819-0395 (Japan).*

<sup>c</sup>*X-ray Science Division, Advanced Photon Source, Argonne National Laboratory, Argonne, Illinois 60439-4858 (USA).*

<sup>d</sup>*Department of Chemistry, Stony Brook University, 100 Nichols Rd, Stony Brook, New York, 11794-3400*

<sup>e</sup>*JST-PRESTO, Honcho 4-1-8, Kawaguchi, Saitama 332-0012 (Japan)*

## **Table of Contents**

Section S1. **Characterization**

Section S2. **Difference envelope density analysis**

Section S3. **Photocatalytic reaction**

## Section S1. Characterization

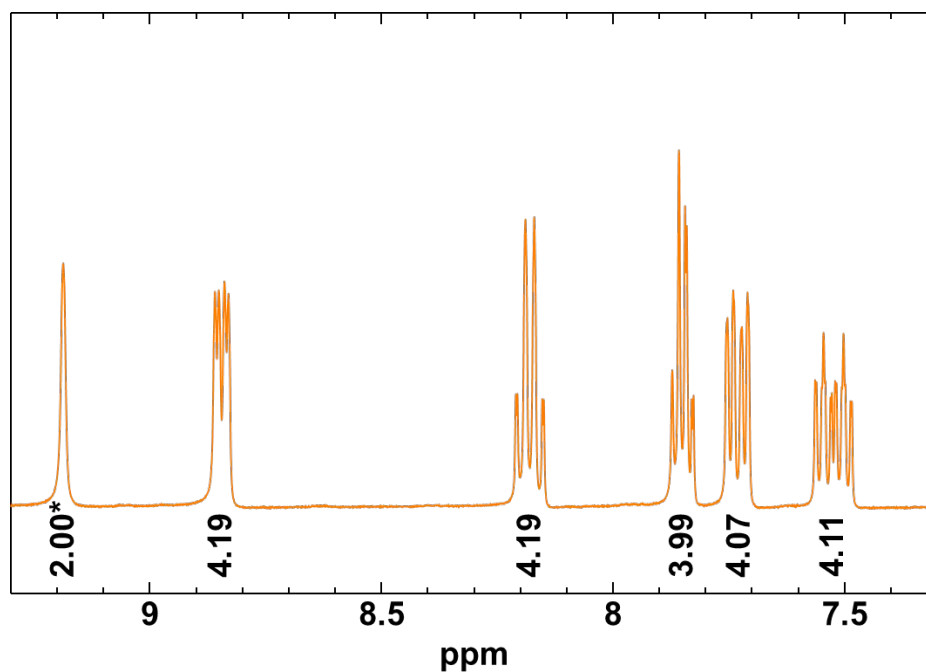

**Figure S1.**  $^1\text{H}$ -NMR spectrum of  $[\text{Ru}^{\text{II}}(\text{bpy})_2(\text{dcbpy})](\text{PF}_6)_2$  ( $\text{RuC}_{32}\text{H}_{24}\text{N}_6\text{O}_4$ ) measured in  $\text{d}_6$ -DMSO. Two protons of two carboxyl groups were not observed.

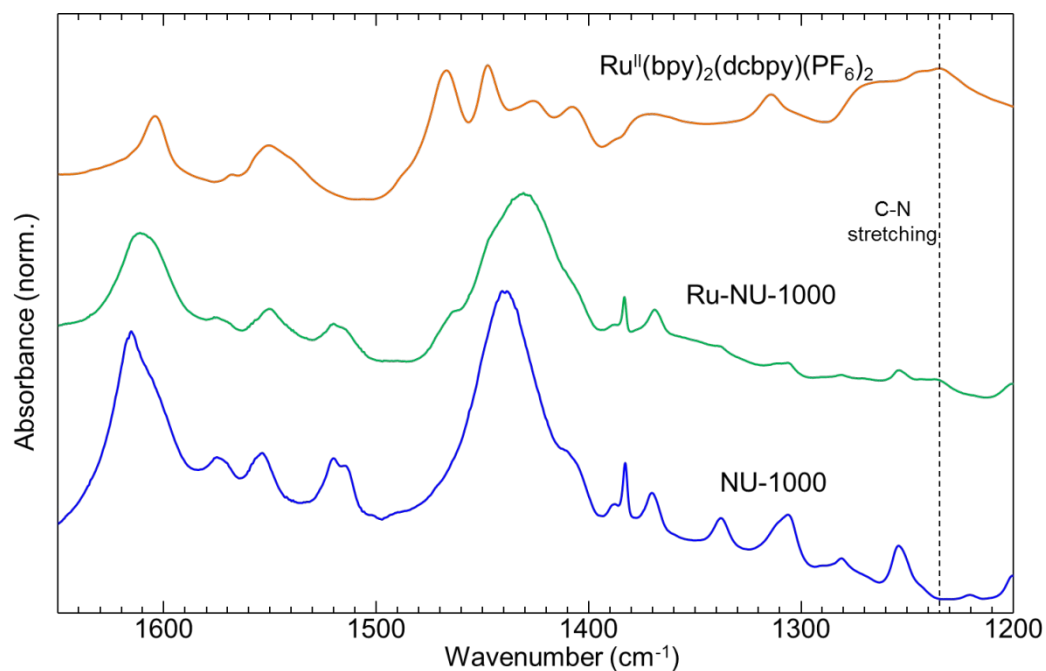

**Figure S2.** DRIFTS spectra of  $[\text{Ru}^{\text{II}}(\text{bpy})_2(\text{dcbpy})](\text{PF}_6)_2$  (orange), Ru-NU-1000 (green), NU-1000 (blue) at room temperature. The peak at  $1234\text{ cm}^{-1}$  due to C-N stretching in Ru complex was also observed in Ru-NU-1000.

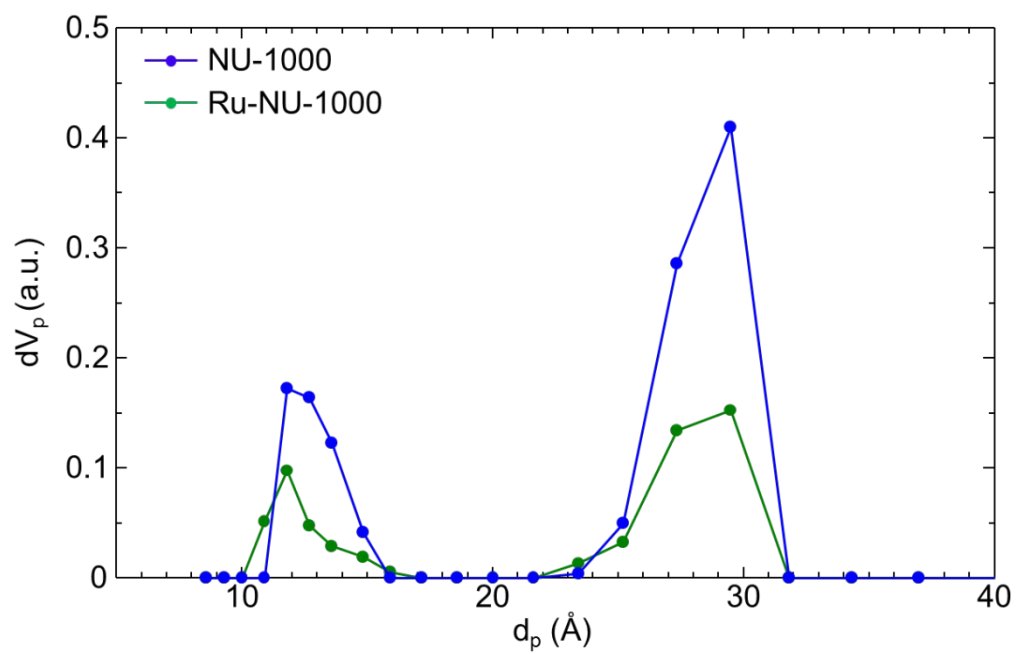

**Figure S3.** Pore diameter distribution of NU-1000 (blue) and Ru-NU-1000 (green).

## Section S2. Difference envelope density (DED) analysis

Ambient temperature powder diffraction data were collected at beamline 17-BM-B at the Advanced Photon Source using 17.04 keV (0.72768 Å) x-rays. Capillaries were loaded with powdered samples, then placed into a sample changer cassette. Diffraction patterns were collected using an amorphous silicon area detector. Calibration and data reduction to one-dimensional patterns were performed using GSAS-II.<sup>[1]</sup>

Lattice parameters were extracted from powder diffraction patterns via Le Bail whole pattern fitting.<sup>[2,3]</sup> A previously published crystal structure for NU-1000 (P6/mmm) was used as a starting model for these analyses.<sup>[4]</sup> Hexagonal lattice and pseudo-Voigt profile parameters were refined. Structure envelopes were generated from the extracted intensities of 24 reflections (out to {6 -1 0}) using previously described methods.<sup>[3,5-7]</sup> Difference envelope densities were then calculated via subtraction of the structure envelope of NU-1000 from that of Ru-NU-1000 to approximate the location of electron density associated with Ru.<sup>[8]</sup> Surfaces were drawn at  $>1.7\sigma$  level to preferentially show contributions from Ru.

## Section S3. Photocatalytic reaction<sup>[9,10]</sup>

To demonstrate the photocatalytic ability of Ru-NU-1000, an amino oxidative coupling was performed. 3 mg of Ru-NU-1000 (the amount of Ru complex was calculated based on the ratio of Zr<sub>6</sub> node and Ru complex in Ru-NU-1000 by ICP-OES) were dispersed in 1 ml toluene and 100 mol equivalent 4-methylbenzylamine against Ru complex were also added as a substrate. Then, the dispersion was sealed in a microwave glass tube, and the dispersion was purged with O<sub>2</sub> for 1 minute. Then, the dispersion was irradiated with Blue LED (450 nm). After irradiation, the dispersion was filtered to remove insoluble contents. The filtrate was dried once under reduced pressure and re-dissolved in deuteriochloroform for <sup>1</sup>H-NMR measurement. The conversion yield for amine oxidative coupling of 4-methylbenzylamine was calculated by comparing integration ratio between the peak of substrate and product (Conversion yield =  $2 \times \text{Product} / (\text{Substrate} + 2 \times \text{Product})$ ) (Fig. S4).

For the reuse experiment, once used Ru-NU-1000 was washed with acetonitrile several times and then used for a new photocatalytic reaction. Furthermore, the structure preservation of once used Ru-NU-1000 was confirmed PXRD measurement (Fig. S5).

As control experiments, the photocatalytic reaction was carried out with 1 mol% [Ru(bpy)<sub>2</sub>(dcbpy)](PF<sub>6</sub>)<sub>2</sub> in acetonitrile and bare NU-1000 in toluene under the same condition. The amount of NU-1000 was calculated by subtracting the amount of Ru complex from 3 mg of Ru-NU-1000

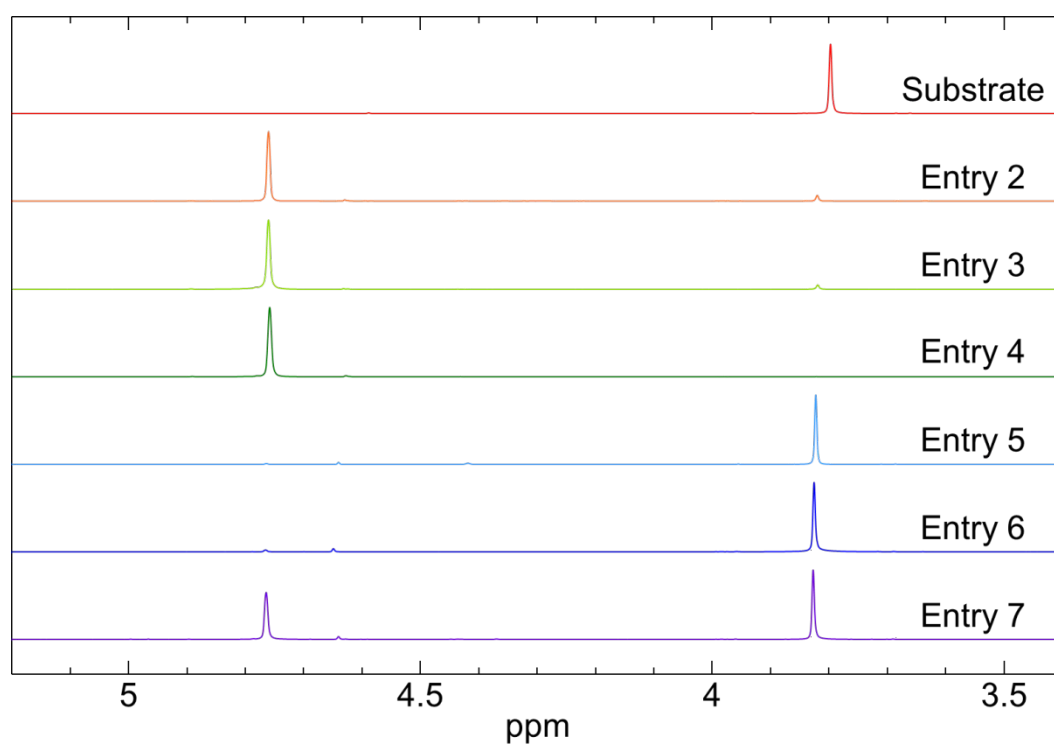

**Figure S4.**  $^1\text{H}$ -NMR spectra of each photocatalysis condition. The peaks around 3.8 ppm and 4.76 ppm were assigned to substrate and product, respectively.

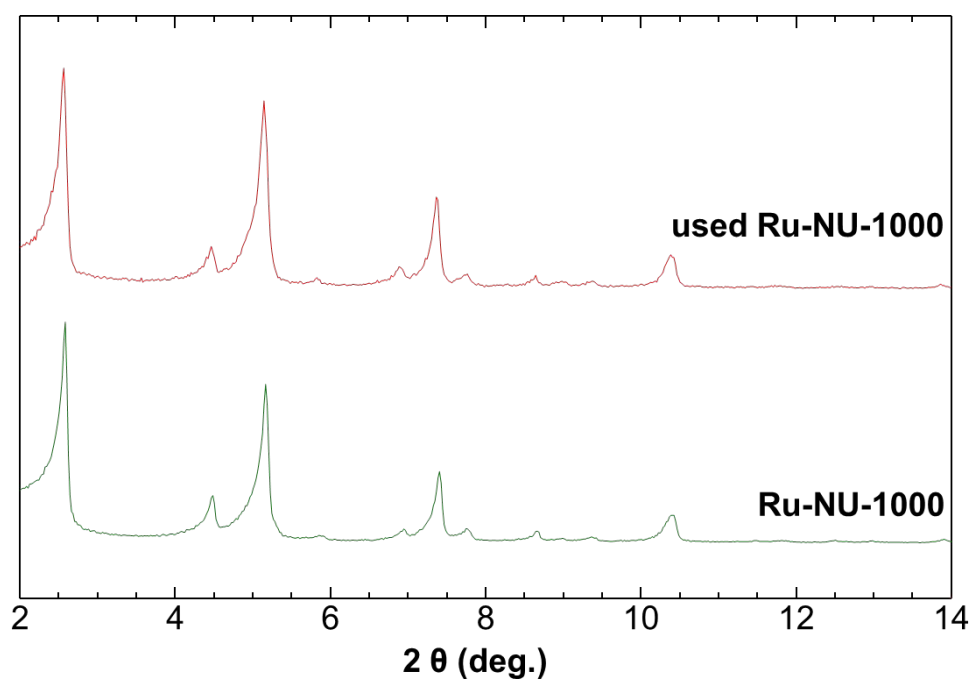

**Figure S5.** PXRD patterns of Ru-NU-1000 once used for photocatalysis (red) and unused Ru-NU-1000 (green)

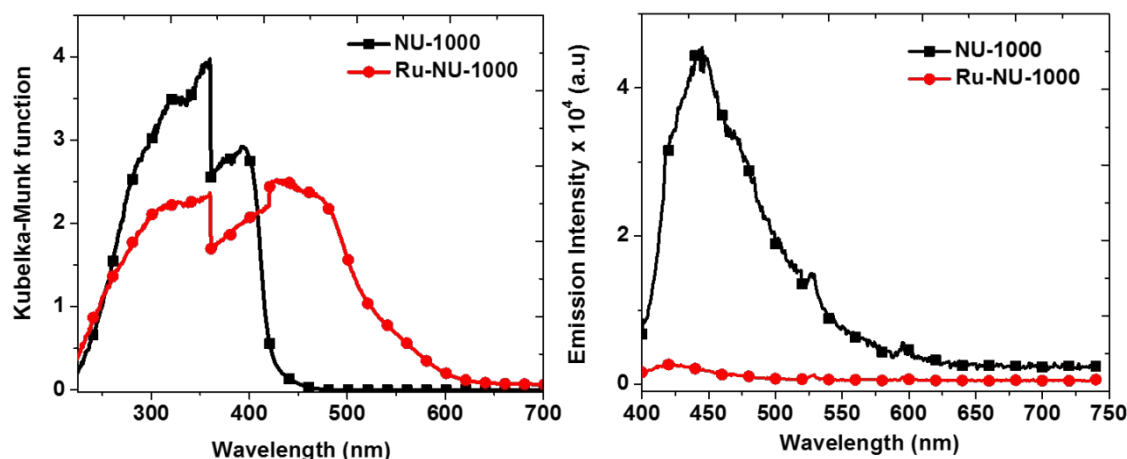

**Figure S6.** The diffuse reflectance UV spectra (left) and steady state emission spectra of NU-1000 and Ru-NU-1000.

## References

- [1] B. H. Toby, R. B. Von Dreele, GSAS-II: the genesis of a modern open-source all-purpose crystallography software package. *J. Appl. Crystallogr.* **2013**, *46*, 544–549.
- [2] A. Le Bail, H. Duroy, J. L. Fourquet, Ab-initio Structure Determination of LiSbW<sub>8</sub> by X-ray Powder Diffraction. *Mater. Res. Bull.* **1988**, *23*, 447–452.
- [3] V. Petříček, M. Dušek, L. Palatinus, Crystallographic Computing System JANA2006: General features. *Zeitschrift für Krist. - Cryst. Mater.* **2014**, *229*, 345.
- [4] J. E. Mondloch, W. Bury, D. Fairen-Jimenez, S. Kwon, E. J. DeMarco, M. H. Weston, A. A. Sarjeant, S. T. Nguyen, P. C. Stair, R. Q. Snurr, Farha, O.K, Hupp, J.T., Vapor-Phase Metalation by Atomic Layer Deposition in a Metal–Organic Framework. *J. Am. Chem. Soc.* **2013**, *135*, 10294–10297.
- [5] A. A. Yakovenko, J. H. Reibenspies, N. Bhuvanesh, H.-C. Zhou, Generation and Applications of Structure Envelopes for Porous Metal–organic Frameworks *J. Appl. Crystallogr.* **2013**, *46*, 346–353.
- [6] L. B. McCusker, C. Baerlocher, R. Grosse-Kunstleve, S. Brenner, T. Wessels, Solving Complex Zeolite Structures from Powder Diffraction Data. *Chim. Int. J. Chem.* **2001**, *55*, 497–504.
- [7] L. B. McCusker, C. Baerlocher, Using Electron Microscopy to Complement X-ray Powder Diffraction Data to Solve Complex Crystal Structures. *Chem. Commun.* **2009**, 1439–1451.
- [8] A. A. Yakovenko, Z. Wei, M. Wriedt, J.-R. Li, G. J. Halder, H.-C. Zhou, Study of Guest Molecules in Metal–Organic Frameworks by Powder X-ray Diffraction: Analysis of Difference Envelope Density. *Cryst. Growth Des.* **2014**, *14*, 5397–5407.
- [9] J. H. Ko, N. Kang, N. Park, H.-W. Shin, S. Kang, S. M. Lee, H. J. Kim, T. K. Ahn, S. U. Son, Hollow Microporous Organic Networks Bearing Triphenylamines and Anthraquinones: Diffusion Pathway Effect in Visible Light-Driven Oxidative Coupling of Benzylamines *ACS Macro Lett.* **2015**, *4*, 669–672.
- [10] C. Wang, Z. Xie, K. E. Dekrafft, W. Lin, Doping Metal–Organic Frameworks for Water

Oxidation, Carbon Dioxide Reduction, and Organic Photocatalysis *J. Am. Chem. Soc.* **2011**, *133*, 13445–13454.
